# Supplementary material for: Evaluating the Effectiveness and Safety of the Electroencephalogram-Based Brain-Machine Interface Rehabilitation System for Patients With Severe Hemiparetic Stroke: Protocol for a Randomized Controlled Trial (BEST-BRAIN Trial)
Source: PubMed Central journal article supplement (PMC6302229; doi:10.2196/12339), 2018-12-06
Supplement: resprot_v7i12e12339_app1.pdf [file resprot_v7i12e12339_app1.pdf]

27 医研開第 3283 号  
平成 28 年 3 月 8 日

慶應義塾大学  
教授  
里宇 明元 殿

国立研究開発法人 日本医療研究開発機構  
理事長 末松 誠

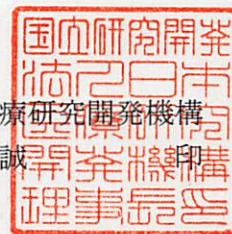

「医療機器開発推進研究事業平成 28 年度 1 次公募」に係る  
選考結果について

拝啓、 時下ますます御清栄のこととお喜び申し上げます。  
さて、先般公募いたしました標記事業につきまして、御応募をいただき厚くお礼申し上げます。  
応募のありました貴提案について、当機構において有識者による厳正な審査を行った結果、貴提案を別紙に  
示す通り、条件付採択することに決定いたしましたので、通知いたします。  
今後とも当機構の実施する事業につきまして、ご支援、ご協力を賜りますようお願い申し上げます。

敬具

【受理番号】 3-06

【提案名】「脳卒中後上肢麻痺に対する脳波—BMI リハビリテーションシステムの医師主導治験」

理由書

|                                                                                                                                                                                                                                                                                                                                                                                                                      |
|----------------------------------------------------------------------------------------------------------------------------------------------------------------------------------------------------------------------------------------------------------------------------------------------------------------------------------------------------------------------------------------------------------------------|
| <p><b>【提案】</b><br/>受理番号 3-06<br/>脳卒中後上肢麻痺に対する脳波—BMI リハビリテーションシステムの医師主導<br/>治験</p>                                                                                                                                                                                                                                                                                                                                    |
| <p><b>【提案者名】</b><br/>慶應義塾大学</p>                                                                                                                                                                                                                                                                                                                                                                                      |
| <p><b>【審査結果】</b><br/>条件付採択</p>                                                                                                                                                                                                                                                                                                                                                                                       |
| <p><b>【理由】</b><br/>ご提案内容を公募要領に示した審査基準に基づき、厳正かつ慎重に審査しました。<br/>貴提案については、BMI リハビリシステムの実用化へ向けた着実な研究・開発実績をもとに<br/>した革新的医療技術・機器の開発と企業への導出が期待できることが評価されました。</p> <p><b>【採択条件】</b></p> <ul style="list-style-type: none"><li>● 導出先であるパナソニック(株)エコソリューション社は製造販売業を持っていないので、製品化に向けて、平成 28 年度内に業許可等の方針を決めること。</li><li>● 到達目標について、AMED と相談し、より定量的な中間・最終目標を設定すること。</li><li>● AMED が提案した予算額で、事業の主旨及び提案内容を損なうことなく、適切に実施すること。</li></ul> |
