# Supplementary material for: Evaluating the Effectiveness and Safety of the Electroencephalogram-Based Brain-Machine Interface Rehabilitation System for Patients With Severe Hemiparetic Stroke: Protocol for a Randomized Controlled Trial (BEST-BRAIN Trial)
Source: PubMed Central journal article supplement (PMC6302229; doi:10.2196/12339), 2018-12-06
Supplement: resprot_v7i12e12339_app2.pdf [file resprot_v7i12e12339_app2.pdf]

16hk0102032h0001  
29 医研開第 2636 号  
平成 29 年 9 月 12 日

学校法人慶應義塾  
理事長 長谷山 彰  
上記代理人 慶應義塾大学医学部長  
岡野 栄之 殿

国立研究開発法人日本医療研究開発機構  
契約担当職 理事長 末松

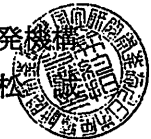

### 確 定 通 知 書

平成 28 年度委託研究開発契約に基づく確定検査の結果、下記のとおり額の確定をしたので通知します。

#### 記

1. 事業名 医療機器開発推進研究事業/
2. 研究開発課題名 脳卒中後上肢麻痺に対する脳波-BMI リハビリテーションシステムの医師主導治験
3. 研究開発担当者 医学部 教授 里宇 明元  
所属 役職 氏名
4. 検査日 平成 29 年 9 月 4 日
5. 委託研究開発費 56,800,000 円
6. 確定額 56,800,000 円
7. 既支払済額 56,800,000 円
8. 返還額 0 円

以 上
